# Supplementary material for: Synthesis of novel poly(dithienylpyridines)Electronic supplementary information (ESI) available: further experimental details. See http://www.rsc.org/suppdata/jm/b2/b201229d/
Source: Royal Society of Chemistry journal article supplement (doi:10.1039/b201229d), 2002-05-30
Supplement: b201229d.doc [file b201229d.doc]

**Synthesis of Novel Poly(dithienylpyridines)**

The information below gives details of the preparation of the following compounds: **1a**, **2a-d**, **4a**, **4b**,**15b-d**, **18**, **23**, and the chemically prepared polymers, poly (**1b-d**) and poly (**2a-d**).

References refer to those listed in the full paper.

**General**

The following compounds were prepared by literature procedures: **13**,14 **14b**,15 **15a**,15 **17**,18 **21,**19 **22**20 and 2-ethynylthiophene.16 NMR spectra were determined at 270 MHz. Petroleum ether refers to the fraction b.p. 40-60 oC.

**Synthesis of 2,6-Diiodopyridines**

**2,6-Diiodo-3-hexanoyloxypyridine 15b** A mixture of 2,6-diiodo-3-hydroxypyridine **13** (10.00 g; 28.8 mmol), pyridine (4.12 g; 58.2 mmol) and dichloromethane (40 mL) was stirred for 10 minutes. Hexanoyl chloride (4.28 g; 31.7 mmol) was added and the solution was stirred at room temperature for 6 hours. The mixture was then washed with distilled water (3 x 20 mL). The organic layer was dried (MgSO4), filtered and evaporated under reduced pressure. The product was purified by column chromatography over silica gel (eluent: dichloromethane) giving compound **15b** (4.45 g; 35 %) as clear liquid. IR (liquid film): 2955, 2868, 1773, 1551, 1507, 1464, 1409, 1328, 1292, 1237, 1131, 1082 and 1049 cm-1. 1H NMR:  7.65 (1H, d, *J*= 8 Hz, Ar*H*), 7.02 (1H, d, *J*=8 Hz, Ar*H*), 2.64 (2H, t, *J*=7 Hz, -COC*H*2-), 1.80 (2H, m, *J*=7 Hz, -COCH2C*H*2-), 1.42–1.32 (4H, m, -C*H*2C*H*2-) and 0.93 (3H, t, *J*=7 Hz, -C*H*3) ppm. 13C NMR (CDCl3):  170.6, 149.1, 134.6, 131.4, 114.3, 111.1, 24.3, 30.9, 24.1, 21.9 and 13.8 ppm; elemental analysis: C11H13I2NO requires C, 29.7; H, 2.9; N, 3.15. Found C, 29.2; H, 2.8; N, 3.1 %; MS (CI) calculated mass 445.9114, measured mass 445.9112.

**3-Benzoyloxy-2,6-diiodopyridine 15c** A mixture of 2,6-diiodo-3-hydroxypyridine **13** (10.0 g; 28.8 mmol), pyridine (4.12 g; 58.2 mmol) and dichloromethane (40 mL) was stirred for 5 minutes. Benzoyl chloride (4.12 g; 29.2 mmol) was added and the solution was stirred (6 hours) at room temperature. The mixture was washed with water (3 x 20 mL), the organic layer was dried (MgSO4) and evaporated. The crude product was recrystallised from methanol giving compound **15c** (5.45 g; 42 %) as white crystals, m.p. 101–103 °C. IR (KBr): 3114, 1744, 1637, 1617, 1540, 1404, 1335, 1243, 1220, 1173,1058 and 1019 cm-1; 1H NMR (CDCl3):  8.28–8.24 (2H, m, Ar*H*), 7.73–7.67 (2H, m, Ar*H*), 7.59–7.53 (2H, m, Ar*H*) and 7.21 (1H, d, *J*=8 Hz, Ar*H*) ppm; 13C NMR (CDCl3):  163.6, 149.3, 143.6, 134.5, 131.5, 130.6, 128.8, 128.1, 113.9 and 111.3 ppm; elemental analysis: C12H7I2NO2 requires C, 33.1; H, 1.6; N, 3.2. Found C, 31.5; H, 1.1; N, 3.0 %; MS (ES) calculated mass 451.8644, measured mass 451.8641.

**3-Diethylcarbamoyloxy-2,6-diiodopyridine 15d** A solution of 2,6-diiodo-3-hydroxypyridine **13** (5.00 g; 14.0 mmol), diethylcarbamyl chloride (2.15 g; 16 mmol) and pyridine (33 mL) was heated at 85 °C with stirring (8 hours) after which time it was allowed to cool to room temperature. The pyridine was evaporated and the residue was dissolved in dichloromethane (30 mL). The mixture was washed with water (3 x 20 mL), the organic layer was dried (MgSO4), filtered and evaporated. The product was then purified by column chromatography over silica gel (eluent: dichloromethane) giving compound **15d** (4.00 g; 64 %) as white crystals, m.p. 75–78 °C.IR (KBr): **max 3447, 2974, 1717, 1552, 1393, 1322, 1376, 1238, 1212, 1147, 1100, 1086 and 1045 cm-1; 1H NMR (CDCl3):  7.67 (1H, d, *J*=8 Hz, Ar*H*), 7.16 (1H, d, *J*=8 Hz, Ar*H*), 3.53 (2H, q, *J*=7 Hz, -C*H*2-), 3.34 (2H, q, *J*=7 Hz, -C*H*2-), 1.32 (3H, t, *J*=7 Hz, -C*H*3) and 1.22 (3H, t, *J*=7 Hz, -*CH*3) ppm; 13C NMR (CDCl3):  151.9, 149.8, 134.4, 131.5, 114.2, 110.4, 42.5, 42.2, 14.3 and 13.2 ppm; elemental analysis: C10H12I2N2O2 requires C, 26.9; H, 2.7; N, 6.3. Found C, 27.1; H, 2.6; N, 6.2 %;

MS (CI) calculated mass 446.9066, measured mass 446.9112.

# Synthesis of 2,6-bis(2-thienyl)pyridines

#### 2,6-bis(2-Thienyl)-3-hydroxypyridine 1a A solution of 3-acetoxy-2,6-bis(2-thienyl)pyridine 2a (1.0 g; 3.5 mmol), potassium hydroxide (1.0 g; 17.9 mmol) and ethanol (40 mL) was heated at reflux for 6 hours. The solution was allowed to cooled to room temperature and solvent was evaporated. Dichloromethane (20 mL) was added to the residue and the mixture was washed with distilled water (3 x 20 mL). Concentrated hydrochloric acid was added dropwise to the aqueous layer with stirring until a precipitate formed. The aqueous layer was extracted with ethyl acetate (5 x 20 mL), the combined organic layers were dried (MgSO4), filtered and evaporated. The crude product was purified by column chromatography over silica gel (eluent: dichloromethane) giving compound 1a (0.30 g; 41 %) as light yellow crystals, m.p. 174 °C (with decomposition). IR (KBr): **max 3449, 1654, 1571, 1533, 1475, 1439, 1396, 1338, 1271, 1167, 1114, 1077 and 1053 cm-1; 1H NMR (d6-DMSO):  10.80 (1H, s, -O*H*), 7.97 (1H, dd, *J*=1 and 4 Hz, Ar*H*), 7.64 (1H, d, *J*=8 Hz, Ar*H*), 7.59-7.57 (2H, m, Ar*H*), 7.51 (1H, dd, *J*=1 and 4 Hz, Ar*H*), 7.33 (1H, d, *J*=8 Hz), 7.14 (1*H*, dd, *J*=4 and 5 Hz, Ar*H*) and 7.10 (1H, dd, *J*=4 and 5 Hz, Ar*H*) ppm; 13C NMR (d6-DMSO):  149.4, 145.1, 143.3, 142.6, 139.2, 128.7, 128.5, 128.1, 127.9, 127.4, 125.0, 123.9 and 118.7 ppm; elemental analysis: C13H9NO requires C, 60.2; H, 3.5; N, 5.4. Found C, 59.9; H, 3.2; N, 5.3 %; MS(CI) calculated mass 260.0204, measured mass 260.0207.

**3-Acetoxy-2,6-bis(2-thienyl)pyridine 2a** The crude product was recrystallised from ethanol to produce compound **2a** (0.28 g; 36 %) as pale yellow crystals, m.p. 112–114 °C. IR (KBr): **max 3448, 3099, 1762, 1654, 1576, 1560, 1458, 1438, 1364, 1263, 1237, 1200, 1187, 1118 and 1063 cm-1; 1H NMR (CDCl3):  7.87 (1H, dd, *J*=1 and 4 Hz, Ar*H*), 7.58 (1H, dd, *J*=1 and 4 Hz, Ar*H*), 7.51 (2H, AB system, A 7.53, B 7.48, *J*=8.5 Hz, Ar*H*), 7.45 (1H, dd, *J*=1 and 5 Hz, Ar*H*), 7.39 (1H, dd, *J*=1 and 5 Hz, Ar*H*), 7.14 (1H, dd, *J*=4 and 5 Hz, Ar*H*), 7.10 (1H, dd, *J*=4 and 5 Hz, Ar*H*) and (3H, s, -C*H*3) ppm; MS (EI) calculated mass for C15H11NO2S2, 301.0231, measured mass 301.0236.

**3-Hexanoyloxy-2,6-bis(2-thienyl)pyridine 2b** The crude product was recrystallised from hexane giving compound **2b** (0.15 g; 25 %) as pale yellow crystals, m.p. 58–61 °C. IR (KBr): **max 3448, 2925, 2867, 1761, 1570, 1560, 1458, 1375, 1262, 1236, 1188, 1134 and 1098 cm-1; 1H NMR (CDCl3):  7.87 (1H, dd, *J*=1 and 4 Hz, Ar*H*), 7.58 (1H, dd, *J*=1 and 4 Hz, Ar*H*), 7.51 (2H, AB system, A 7.53, B 7.49, *J*AB=8.7 Hz, Ar*H*), 7.45 (1H, dd, *J*=1 and 5 Hz, Ar*H*), 7.40 (1H, dd, *J*=1 and 5 Hz), 7.14 (1H, dd, *J*=4 and 5 Hz, Ar*H*), 7.11 (1H, dd, *J*=4 and 5 Hz, Ar*H*), 2.72 (2H, t, *J*=7 Hz, -O2CC*H*2-), 1.80 (2H, m, -O2CCH2C*H*2-), 1.41 (4H, m, -C*H*2C*H*2CH3) and 0.94 (3H, t, *J*=7 Hz, -C*H*3) ppm; 13C NMR (CDCl3):  171.6, 149.5, 144.2, 144.0, 141.6, 140.5, 132.1 128.5, 128.1, 128.0, 127.9, 127.8, 124.9, 117.2, 34.7, 31.3, 24.4, 22.4 and 14.0 ppm; elemental analysis: C19H19NO2S2 requires C, 63.8; H, 5.4; N, 3.9. Found C, 63.3; H, 5.2; N, 3.75 %; MS (EI) calculated mass 357.0857, measured mass 357.0852.

**3-Benzoyloxy-2,6-bis(2-thienyl)pyridine** **2c** The crude product was recrystallised from ethanol giving compound **2c** (0.15 g; 19 %) as light yellow crystals, m.p. 118 °C (with decomposition). IR (KBr): **max 3448, 3069, 1733, 1654, 1576, 1560, 1528, 1458, 1436, 1387, 1263, 1231, 1192, 1174, 1114, 1075, 1053 and 1024 cm-1; 1H NMR (CDCl3):  8.31 (2H, m, Ar*H*), 7.82 (1H, dd, *J*=1 and 4 Hz, Ar*H*), 7.78–7.68 (1H, m, Ar*H*), 7.63–7.53 (5H, m, Ar*H*), 7.43–7.38 (2H, m, Ar*H*), 7.12 (1H, dd, *J*=4 and 5 Hz, Ar*H*) and 7.05 (1H, dd, *J*=4 and 5 Hz, Ar*H*) ppm; 13C NMR (CDCl3):  164.5, 149.7, 144.3, 144.2, 141.7, 140.6, 134.2, 132.3, 130.6, 129.2, 129.0, 128.6, 128.1, 127.9, 127.9, 125.0, 121.7 and 117.4 ppm; MS (EI) calculated mass for C20H13NO2S2, 363.0388, measured mass 363.0385.

**3-Diethylcarbamoyloxy-2,6-bis(2-thienyl)pyridine 2d** The crude product was recrystallised from ethanol giving compound **2d** (0.30 g; 37 %) as pale yellow crystals, m.p. 94–96 °C. IR (KBr): **max 3097, 2973, 1706, 1654, 1575, 1459, 1415, 1312, 1276, 1260, 1241, 1191, 1154, 1119, 1076 and 1033 cm-1; 1H N.M.R (CDCl3):  7.79 (1H, dd, *J*=1 and 4 Hz, Ar*H*), 7.57-7.37 (5H, m, Ar*H*), 7.137.07 (2H, m, Ar*H*), 3.61 (2H, q, *J*=7 Hz, -C*H2*-), 3.41 (2H, q, J=7 Hz, -C*H*2-), 1.31 (3H, t, *J*=7 Hz, Ar*H*) and 1.21 (3H, t, *J*=7 Hz, Ar*H*) ppm; 13C NMR (CDCl3):  153.2, 148.9, 144.4, 144.4, 142.4, 140.7, 132.2, 128.1, 127.9, 127.7, 127.5, 127.4, 124.6, 117.3, 42.2, 41.8, 14.3 and 13.3 ppm; elemental analysis: C18H18N2O2S2 requires C, 60.3; H, 5.1; N, 7.8. Found C, 60.4; H, 5.0; N, 7.6 %; MS (CI) calculated mass 359.0888, measured mass 359.0895.

**2,6-Bis(2-thienyl)pyridine-1-oxide 4a** The crude product was purified by column chromatography over silica gel (eluent: dichloromethane) giving compound **4a** (0.66 g; 32 %) as pale yellow crystals, m.p. 140 °C (with decomposition). IR (KBr): **max 3448, 3067, 1560, 1549, 1551, 1474, 1419, 1400, 13551, 1284, 1242, 1175 1103, 1071 and 1047 cm-1; 1H NMR (d6-DMSO):  8.26 (2H, d, *J*=8 Hz, Ar*H*), 8.21 (2H, dd, *J*=1 and 4 Hz, Ar*H*), 7.79 (2H, dd, *J*=1 and 5 Hz, Ar*H*), 7.56 (1H, t, *J*=8 Hz, Ar*H*) and 7.28 (2H, dd, *J*=4 and 5 Hz, Ar*H*) ppm; 13C NMR (d6-DMSO):  142.5, 131.7, 131.7, 129.1, 127.0, 126.4 and 120.1 ppm; elemental analysis: C13H9NOS2 requires C, 60.2; H 3.5; N, 5.4. Found C, 60.0; H, 3.3; N, 5.3 %; MS **(**ES**)** calculated mass 260.0204, measured mass 260.0200.

**3-Methoxy-2,6-bis(2-thienyl)pyridine-1-oxide 4b** The product was purified by column chromatography over silica gel (eluent: dichloromethane) giving compound **4b** (0.15 g; 14 %) as pale green crystals, m.p. 112-114 °C. IR (KBr): **max 3447, 3066, 1654, 1559, 1515, 1475, 1420, 1387, 1303, 1259, 1202, 1179, 1119, 1084 and 1036 cm-1; 1H NMR (CDCl3):  8.43 (1H, dd, *J*=1 and 4 Hz, Ar*H*), 7.70 (1H, d, *J*=9 Hz, Ar*H*), 7.70 (1H, dd, *J*=1 and 4 Hz, Ar*H*), 7.58 (1H, dd, *J*=1 and 5 Hz, Ar*H*), 7.50 (1H, dd, *J*=1 and 5 Hz, Ar*H*), 7.22 (1H, dd, *J*=4 and 5 Hz, Ar*H*), 7.16 (1H, dd, *J*=4 and 5 Hz, Ar*H*), 7.05 (1H, d, *J*=9 Hz, Ar*H*) and 4.01 (3H, s, -OC*H*3) ppm; 13C NMR (CDCl3):  152.4, 137.0, 134.7, 132.6, 132.0, 129.5, 129.3, 129.2, 126.0, 125.9, 125.7, 117.9, 109.6 and 56.6 ppm; elemental analysis: C14H11NO2S2.H2O requires C, 54.7; H 3.6; N, 4.6. Found C, 54.5; H, 3.5; N, 4.6 %; MS (ES) calculated mass 290.0309, measured mass 290.0312.

**Synthesis of 2,6-bis(2-thienylethynyl)-3-benzyloxypyridine 18**. A mixture of compound **14d** (1.0g; 2.3 mmol), copper (I) iodide (0.07 g; 0.37 mmol), triethylamine (10 mL), diisopropylamine (10 mL) and a catalytic quantity of Pd(PPh3)4 (0.07 g) was stirred for 5 minutes under a nitrogen atmosphere. 2-Ethynylthiophene (0.62 g; 5.7 mmol) was then added and the solution was stirred for 22 hours at room temperature. The mixture was evaporated and dichloromethane (20 mL) was added to the residue. The solution was washed with distilled water (3 x 20 mL), the organic layer was dried (MgSO4) and evaporated. The crude product was purified by column chromatography over silica gel (eluent: ethyl acetate: petroleum ether, 3:7) yielding compound **18** (0.56 g; 62 %) as light brown crystals, m.p. 150–153 °C. IR (KBr): **max 3446, 3063, 2205, 1654, 1559, 1518, 1497, 1458, 1445, 1416, 1376, 1355, 1301, 1277, 1228, 1126, 1109, 1041 and 1017 cm-1; 1H NMR (CDCl3):  7.53-7.50 (2H, m, Ar*H*), 7.45–7.30 (8H, board m, Ar*H*), 7.21 (1H, d, *J*=9 Hz, Ar*H*), 7.04–6.99 (2H, m, Ar*H*) and 5.23 (2H, s, -OC*H*2-) ppm; 13C NMR (CDCl3):  155.3, 135.8, 135.6, 134.7, 133.4, 133.0, 128.8, 128.6, 128.3, 128.1, 127.3, 127.2, 127.1, 126.9, 122.6, 122.5, 119.7, 91.8, 88.9, 88.1, 81.7 and 70.7 ppm; MS (CI) calculated mass for C24H15NOS2, 398.0673, measured mass 398.0673.

**Synthesis of 2,6-dibromo-3-methoxypyridine *N*-oxide 23** A solution of 2,6-dibromo-3-methoxypyridine **21** (4.50 g; 17 mmol) and trifluoroacetic acid (40 mL) was stirred at 80 °C. To this solution 30 % hydrogen peroxide solution (6.3 mL) was added dropwise and the mixture was stirred at 80 °C for 2 hours. More 30% hydrogen peroxide solution (4.2 mL) was then added dropwise and the solution was stirred for a further 4 hours at 80 °C. The solution was then allowed to cool to room temperature, water (40 mL) was added and the solution was left to stir for 30 minutes. The solid (mostly unreacted starting material) was collected by filtration and the mother liquor was subjected to an azeotropic distillation with butan-1-ol. The butan-1-ol was then evaporated yielding the crude product which was recystallised from tetrahydrofuran giving compound **23** (1.10 g; 23 %) as white crystals, m.p. 170 °C (with decomposition). IR (KBr): **max 3448, 1654, 1525, 1438, 1359, 1256, 1157, 1134 and 1110 cm-1; 1H NMR (d6-DMSO):  7.91 (1H, d, *J*=9 Hz, Ar*H*), 7.13 (1H, d, *J*=9 Hz, Ar*H*) and 3.93 (3H, s, -C*H*3) ppm; 13C NMR (d6-DMSO):  155.6, 128.3, 125.8, 124.4, 110.5 and 58.1 ppm; elemental analysis: C6H5Br2NO2 requires C, 25.5; H, 1.8; N, 4.95. Found C, 25.6; H, 1.5; N, 4.9 %; MS (ES) calculated mass 281.8765, measured mass 281.8764.

**Synthesis of polymers using Stille coupling methodology**

A solution of the appropriate 2,6-dihalogenated pyridine derivative (1.00 g), 5,5’-bis-(tributylstannyl)-2,2'-bithiophene (1 mol equivalent) and tetrakis(triphenylphosphine)palladium(0) (5 % mol) in toluene (40 mL) was stirred at reflux under nitrogen for 24 hours. The solution was allowed to cool to room temperature and the toluene was evaporated. Methanol (30 mL) was added to the residue precipitating the polymer. The precipitate was collected, washed with methanol (2 x 10 mL) and dried under vacuum. Some of the crude polymer was extracted (soxhlet) with boiling toluene for 24 hours to remove lower molecular weight material.

**Poly (1b)** Compound **14b** gave the crude polymer (0.84 g; 27 %) as a brown powder. After soxhlet extraction a dark orange-brown solid (0.31 g) was recovered from 0.40 g of the crude polymer, m.p. >250 °C. IR (KBr) **max 3448, 1654, 1560, 1458, 1263, 1129 and 1007 cm-1; 1H NMR (CF3CO2D):  8.3-7.6 (6H, m, Ar*H*) and 4.40 (3H, broad s, -OC*H*3); elemental analysis: (C14H9NOS2)n requires C, 62.0; H, 3.3; N, 5.2. Found C, 58.6; H, 3.2; N, 3.9 %.

**Poly (1c)** Compound **14c** gave the crude polymer (0.78 g; 29 %) as a brown powder. After soxhlet extraction an orange brown solid (0.25 g) was recovered from 0.50 g of the crude polymer, m.p. 215 °C (with decomposition). IR (KBr) **max 3447, 2934, 1654, 1560, 1449, 1387, 1265, 1127, 1074 and 1005 cm-1; 1H NMR (CF3CO2D):  8.10 (2H, broad, Ar*H*), 7.88 (1H, broad d, *J*=8 Hz, Ar*H*), 7.78 (1H, broad, Ar*H*), 7.53 (2H, m, Ar*H*), 4.43 (2H, broad, -OC*H*2-), 2.08 (2H, broad, -C*H*2-), 1.68 (2H, broad, -C*H*2-), 1.38 (4H, broad, 2 x -C*H*2-) and 0.88 (3H, broad, -C*H*3) ppm; elemental analysis: (C19H19NOS2)n requires C, 66.8; H, 5.6; N, 4.1. Found C, 64.6; H, 5.35; N, 3.7 %.

**Poly (1d)** Compound **14d** gave the crude polymer (0.87 g; 32 %) as a light brown powder. After soxhlet extraction an orange brown solid (0.31 g) was recovered from (0.50 g) the crude polymer, m.p. 240 °C (with decomposition). IR (KBr) **max 3448, 1654, 1560, 1438, 1376, 1261, 1124, 1083 and 989 cm-1; 1H NMR (CF3CO2D):  8.08 (2H, broad, Ar*H*), 7.72 (3H, m, Ar*H*), 7.38 (6H, m, Ar*H*), and 5.50 (2H, broad, -C*H*2-) ppm; elemental analysis: (C20H13NOS2)n requires C, 69.1; H, 3.8; N, 4.0. Found C, 65.3; H, 3.8; N, 3.5 %.

**Poly (2a)** Compound **15a** gave the crude polymer (0.93 g; 32 %) as a brown powder. After soxhlet extraction an orange brown coloured solid (0.31 g) was recovered from 0.40 g of the crude polymer, m.p. 220 °C (with decomposition). IR (KBr): **max 3413, 3065, 2926, 1752, 1567, 1449, 1382, 1364, 1262, 117, 1115, 1067 and 1006 cm-1; 1H NMR (CF3CO2D):  8.7-7.2 (6H, m, Ar*H*) and 2.88 (3H, broad, -OCOC*H*3) ppm; elemental analysis: (C15H9NO2S2)n requires C, 60.2; H, 3.0; N, 4.7. Found C, 57.8; H, 3.0; N, 4.3 %.

**Poly (2b)** Compound **15b** gave the crude polymer (0.84 g; 31 %) as a yellow brown powder. After soxhlet extraction a brown solid (0.20 g) was recovered from 0.50 g of the crude polymer m.p. 160 °C (with decomposition). IR (KBr): **max 3448, 3066, 2952, 2926, 2860, 1760, 1569, 1522, 1449, 1381, 1314, 1262, 1236, 1187, 1127 and 1090 cm-1; 1H NMR (CF3CO2D):  8.37 (1H, broad d, J= 8 Hz, Ar*H*), 7.96 (3H, m, Ar*H*), 7.58 (2H, m, Ar*H*), 2.80 (2H, broad t, *J*=8 Hz, -COC*H*2-), 1.78 (2H, broad, -C*H*2-), 1.31 (4H, broad, 2 x -C*H*2-) and 0.81 (3H, broad, -C*H*3) ppm; elemental analysis: (C19H17NO2S2)n requires C, 64.2; H, 4.8; N, 3.9. Found C, 61.1; H, 4.3; N, 3.6 %.

**Poly (2c)** Compound **15c** gave the crude polymer (0.97 g; 37 %) as an orange brown powder. After soxhlet extraction a brown powder (0.40 g) was recovered from 0.50 g of the crude polymer, m.p. >250 °C. IR (KBr): **max 3420, 3063, 2924, 1740, 1654, 1600, 1568, 1449, 1382, 1314, 1259, 1228, 1188, 1175, 1116, 1077, 1046 and 1021 cm-1; 1H NMR (CF3CO2D):  8.5-6.9 (11H, m, Ar*H*) ppm; elemental analysis: (C20H11NO2S2)n requires C, 66.5; H, 3.1; N, 3.9. Found C, 62.9; H, 3.2; N, 3.3 %.

**Poly (2d)** Compound **15c** gave the crude polymer (0.86 g; 32 %) as a light yellow powder. After soxhlet extraction a light brown solid (0.28 g) was recovered from 0.40 g of the crude polymer, m.p. 220 °C (with decomposition). IR (KBr): **max 3510, 3065, 2969, 2930, 1719, 1570, 1522, 1450, 1414, 1270, 1297, 1145, 1068 and 1032 cm-1; 1H NMR (CF3CO2D):  8.72 (1H, broad d, *J*=8 Hz, Ar*H*), 8.30 (3H, m, Ar*H*), 7.90 (2H, m, Ar*H*), 4.05 (2H, broad, -C*H*2-), 3.80 (2H, broad, -C*H*2-), 1.70 (3H, broad, -C*H*3) and 1.58 (3H, broad, -C*H*3) ppm; elemental analysis: (C18H16N2O2S2)n requiresC 60.65; H, 4.5; N, 7.9. Found C, 60.2; H, 4.3; N, 6.5 %.
